# Supplementary material for: Spatially Distinct Neutrophil Responses within the Inflammatory Lesions of Pneumonic Plague
Source: PubMed Central journal article supplement — mBio. 2015 Oct 13;6(5):e01530-15. doi: 10.1128/mBio.01530-15 (PMC4620470; doi:10.1128/mbio.01530-15), 2015-10-13
Supplement: mbo005152504sf1.pdf [file mbo005152504sf1.pdf]

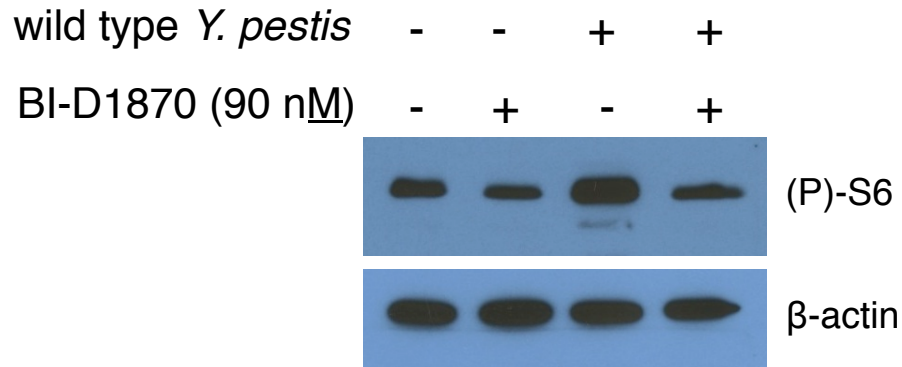

**Figure S1. BI-D1870 continues to inhibit RSK activity after 24 hours in isolated human neutrophils.**

Primary human neutrophils were incubated with or without bacterial inoculation and RSK inhibitor (BI-D1870). After 24 hours, neutrophils were harvested and lysed for Western blot analysis. Treatment with the BI-D1870 caused a decrease in the phosphorylation of S6 in both uninoculated and wild type *Y. pestis*-inoculated samples, even after 24 hours.
