# Supplementary material for: Spatially Distinct Neutrophil Responses within the Inflammatory Lesions of Pneumonic Plague
Source: PubMed Central journal article supplement — mBio. 2015 Oct 13;6(5):e01530-15. doi: 10.1128/mBio.01530-15 (PMC4620470; doi:10.1128/mbio.01530-15), 2015-10-13
Supplement: mbo005152504sf2.pdf [file mbo005152504sf2.pdf]

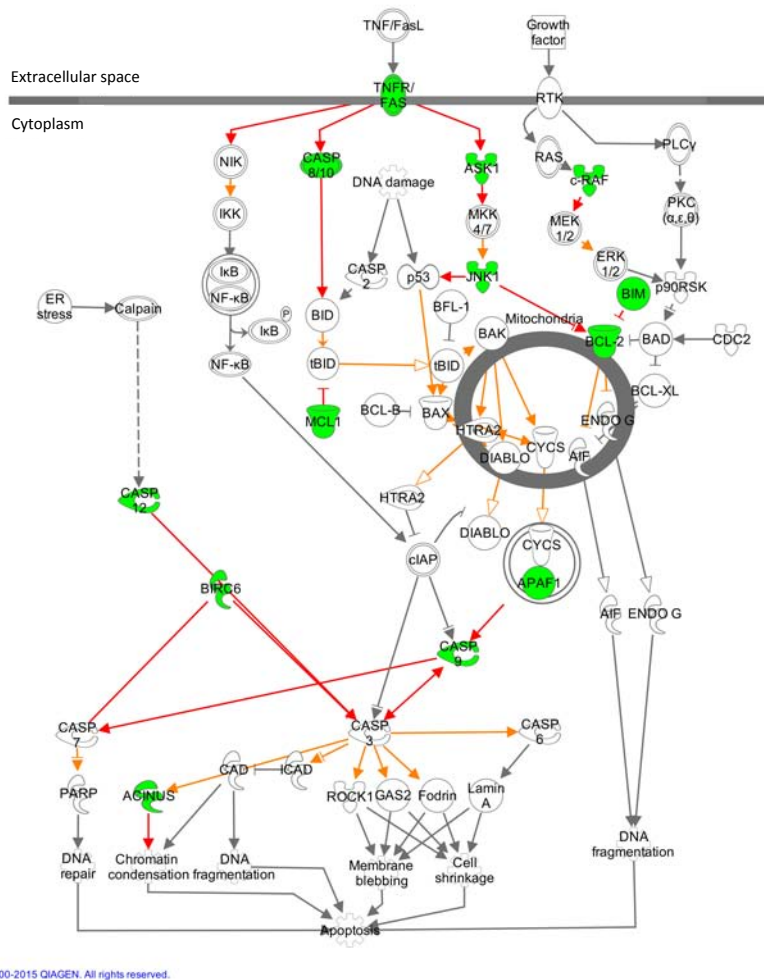

**Figure S2. Ingenuity® Pathway Analysis “Apoptosis Signaling” pathway overlaid with relevant genes from density curve analysis**

Genes from the “Apoptosis Signaling” pathway from IPA® were included in the “Apoptosis genes” list used in the density curve analysis. The density curve analysis identified the “Apoptosis genes” list as being transcriptionally decreased in the center of lesions so individual genes with  $p < 0.5$  were overlaid onto the IPA® “Apoptosis Signaling” pathway (green) to visually represent small transcriptional changes throughout the pathway in the center of lesions. Red lines represent direct interactions that would be

affected by decreased transcription of identified genes in cells. Orange lines represent secondary affects of the identified genes being down-regulated in cells.
